# Supplementary material for: Malaria Prevalence in Endemic Districts of Bangladesh
Source: PLoS One. 2009 Aug 25;4(8):e6737. doi: 10.1371/journal.pone.0006737 (PMC2726938; doi:10.1371/journal.pone.0006737)
Supplement: Table S1 — (0.13 MB XLS) [file pone.0006737.s001.xls]

## Sheet: Sheet2
Region	Author	YEAR	REPORT_TYPE	COUNTRY	Admin1=District (code)	Admin2=Thana (code)	Admin3=Union (code)	Admin4=Mauza (code)	Admin4=Village (code)	LoAge	UpAge	Lat	Long	Latlong_source	MoStart	YeStart	MoEnd	YeEnd	Ex	Total number of Pf	Total number of Pv	Total number of Mixed (Pf+Pv)	METHOD
Asia	Haque	2007	Journal	Bangladesh	91	27	11	793	99	3	62	25.1492	91.7094	GPS	11	2007	11	2007	25	0	0	1	RDT
Asia	Haque	2007	Journal	Bangladesh	91	27	47	980	99	6	72	25.1467	91.8275	GPS	11	2007	11	2007	25	0	0	0	RDT
Asia	Haque	2007	Journal	Bangladesh	91	41	52	464	99	4	80	25.0311	92.0075	GPS	11	2007	11	2007	25	0	0	0	RDT
Asia	Haque	2007	Journal	Bangladesh	91	41	52	243	99	3	60	25.0289	92.0025	GPS	11	2007	11	2007	25	0	0	0	RDT
Asia	Haque	2007	Journal	Bangladesh	91	41	73	060	99	3	90	25.1053	91.8958	GPS	11	2007	11	2007	25	0	0	0	RDT
Asia	Haque	2007	Journal	Bangladesh	91	53	63	443	99	6	59	25.1306	92.1456	GPS	11	2007	11	2007	25	0	0	0	RDT
Asia	Haque	2007	Journal	Bangladesh	91	41	42	252	99	16	60	25.1189	91.96	GPS	11	2007	11	2007	25	0	0	0	RDT
Asia	Haque	2007	Journal	Bangladesh	91	27	47	383	99	3	65	25.16	91.7658	GPS	11	2007	11	2007	25	0	0	0	RDT
Asia	Haque	2007	Journal	Bangladesh	91	53	52	023	99	3	65	25.1658	92.0986	GPS	11	2007	11	2007	25	0	0	0	RDT
Asia	Haque	2007	Journal	Bangladesh	91	27	71	227	01	6	70	25.0767	91.7358	GPS	11	2007	11	2007	25	0	0	0	RDT
Asia	Haque	2007	Journal	Bangladesh	91	41	21	298	99	2	75	25.0056	91.9733	GPS	11	2007	11	2007	25	0	0	0	RDT
Asia	Haque	2007	Journal	Bangladesh	91	41	63	014	01	17	60	25.0161	91.8536	GPS	11	2007	11	2007	25	0	0	0	RDT
Asia	Haque	2007	Journal	Bangladesh	91	41	63	675	99	4	58	25.0186	91.8583	GPS	11	2007	11	2007	25	0	0	0	RDT
Asia	Haque	2007	Journal	Bangladesh	91	41	63	559	01	3	65	25.0211	91.9328	GPS	11	2007	11	2007	25	0	0	0	RDT
Asia	Haque	2007	Journal	Bangladesh	91	59	09	980	03	3	61	25.0558	92.1869	GPS	11	2007	11	2007	25	0	0	0	RDT
Asia	Haque	2007	Journal	Bangladesh	91	59	09	945	02	8	85	25.0344	92.1633	GPS	11	2007	11	2007	25	0	0	0	RDT
Asia	Haque	2007	Journal	Bangladesh	91	59	38	254	04	2	74	24.9619	92.1503	GPS	11	2007	11	2007	25	0	0	0	RDT
Asia	Haque	2007	Journal	Bangladesh	91	59	38	951	01	8	62	24.9375	92.1536	GPS	11	2007	11	2007	25	0	0	0	RDT
Asia	Haque	2007	Journal	Bangladesh	91	59	70	561	99	3	80	25.005	92.28	GPS	11	2007	11	2007	25	0	0	0	RDT
Asia	Haque	2007	Journal	Bangladesh	91	59	38	785	03	6	100	24.9717	92.1514	GPS	11	2007	11	2007	25	0	0	0	RDT
Asia	Haque	2007	Journal	Bangladesh	91	59	72	127	99	2	62	25.0122	92.3189	GPS	11	2007	11	2007	25	0	0	0	RDT
Asia	Haque	2007	Journal	Bangladesh	91	59	47	664	99	4	65	24.9964	92.2594	GPS	11	2007	11	2007	25	0	0	0	RDT
Asia	Haque	2007	Journal	Bangladesh	91	59	47	990	99	12	60	25.0369	92.2558	GPS	11	2007	11	2007	25	0	0	0	RDT
Asia	Haque	2007	Journal	Bangladesh	91	59	47	990	99	12	60	25.0369	92.29	GPS	11	2007	11	2007	25	0	0	0	RDT
Asia	Haque	2007	Journal	Bangladesh	91	59	38	573	03	11	65	24.9256	92.1264	GPS	11	2007	11	2007	25	0	0	0	RDT
Asia	Haque	2007	Journal	Bangladesh	91	59	72	071	99	3	60	25.0028	92.4025	GPS	11	2007	11	2007	25	0	0	0	RDT
Asia	Haque	2007	Journal	Bangladesh	91	59	19	985	03	7	65	24.9714	92.2006	GPS	11	2007	11	2007	25	0	0	0	RDT
Asia	Haque	2007	Journal	Bangladesh	91	53	31	769	99	7	60	25.0681	92.1106	GPS	11	2007	11	2007	25	0	0	0	RDT
Asia	Haque	2007	Journal	Bangladesh	91	53	45	928	99	4	80	24.9492	91.9997	GPS	11	2007	11	2007	25	0	0	0	RDT
Asia	Haque	2007	Journal	Bangladesh	91	53	45	760	99	2	82	24.9892	92.0442	GPS	11	2007	11	2007	25	0	0	0	RDT
Asia	Haque	2007	Journal	Bangladesh	89	90	79	111	99	3	60	25.2382	89.9462	GPS	10	2007	10	2007	25	0	1	0	RDT
Asia	Haque	2007	Journal	Bangladesh	89	90	79	111	99	3	60	25.2546	89.9464	GPS	10	2007	10	2007	25	0	0	0	RDT
Asia	Haque	2007	Journal	Bangladesh	89	90	79	513	99	4	82	25.2546	89.914	GPS	10	2007	10	2007	25	0	0	0	RDT
Asia	Haque	2007	Journal	Bangladesh	89	90	79	513	99	4	82	25.2521	89.9131	GPS	10	2007	10	2007	25	0	0	0	RDT
Asia	Haque	2007	Journal	Bangladesh	89	90	47	860	99	3	59	25.1961	89.9177	GPS	10	2007	10	2007	25	0	0	0	RDT
Asia	Haque	2007	Journal	Bangladesh	89	90	47	860	99	1	70	25.1996	89.9042	GPS	10	2007	10	2007	25	0	0	0	RDT
Asia	Haque	2007	Journal	Bangladesh	89	90	47	625	99	5	65	25.208	89.9001	GPS	10	2007	10	2007	25	0	0	0	RDT
Asia	Haque	2007	Journal	Bangladesh	89	90	31	256	99	1	75	25.1193	90.0004	GPS	10	2007	10	2007	25	0	0	0	RDT
Asia	Haque	2007	Journal	Bangladesh	89	90	31	435	99	1	65	25.1207	90.0088	GPS	10	2007	10	2007	25	0	0	0	RDT
Asia	Haque	2007	Journal	Bangladesh	89	90	86	927	04	3	72	25.1534	89.9296	GPS	10	2007	10	2007	25	0	0	0	RDT
Asia	Haque	2007	Journal	Bangladesh	89	90	63	558	99	5	72	25.0608	90.0071	GPS	10	2007	10	2007	25	0	0	0	RDT
Asia	Haque	2007	Journal	Bangladesh	89	90	86	938	05	1	70	25.1466	89.9201	GPS	10	2007	10	2007	25	0	0	0	RDT
Asia	Haque	2007	Journal	Bangladesh	89	90	86	301	99	8	75	25.1331	89.8842	GPS	10	2007	10	2007	25	0	0	0	RDT
Asia	Haque	2007	Journal	Bangladesh	89	90	15	893	01	4	54	25.1205	89.9157	GPS	10	2007	10	2007	25	0	0	0	RDT
Asia	Haque	2007	Journal	Bangladesh	89	90	15	212	01	3	50	25.0885	89.9344	GPS	10	2007	10	2007	25	0	0	0	RDT
Asia	Haque	2007	Journal	Bangladesh	89	90	15	122	01	5	70	25.0669	89.9211	GPS	10	2007	10	2007	25	0	0	0	RDT
Asia	Haque	2007	Journal	Bangladesh	89	37	15	066	05	2	80	25.16	90.0928	GPS	10	2007	10	2007	25	0	0	0	RDT
Asia	Haque	2007	Journal	Bangladesh	89	37	15	066	03	2	80	25.1528	90.0883	GPS	10	2007	10	2007	25	0	0	0	RDT
Asia	Haque	2007	Journal	Bangladesh	89	90	39	067	01	13	65	25.1322	89.9992	GPS	10	2007	10	2007	25	0	0	0	RDT
Asia	Haque	2007	Journal	Bangladesh	89	37	15	066	02	2	80	25.1539	90.0947	GPS	10	2007	10	2007	25	0	0	0	RDT
Asia	Haque	2007	Journal	Bangladesh	89	90	39	145	99	2	85	25.1381	89.9767	GPS	10	2007	10	2007	25	0	0	0	RDT
Asia	Haque	2007	Journal	Bangladesh	89	90	39	748	99	12	75	25.1436	89.9522	GPS	10	2007	10	2007	25	0	0	0	RDT
Asia	Haque	2007	Journal	Bangladesh	89	90	94	949	99	3	52	25.1581	89.9386	GPS	10	2007	10	2007	25	0	0	0	RDT
Asia	Haque	2007	Journal	Bangladesh	89	37	50	252	99	12	68	25.0983	90.0356	GPS	10	2007	10	2007	25	0	0	0	RDT
Asia	Haque	2007	Journal	Bangladesh	89	37	50	915	99	5	47	25.0942	90.0831	GPS	10	2007	10	2007	25	0	0	0	RDT
Asia	Haque	2007	Journal	Bangladesh	89	37	50	106	99	7	60	25.1064	90.0797	GPS	10	2007	10	2007	25	0	0	0	RDT
Asia	Haque	2007	Journal	Bangladesh	89	37	05	198	99	2	65	25.1994	90.0456	GPS	10	2007	10	2007	25	0	0	0	RDT
Asia	Haque	2007	Journal	Bangladesh	89	37	43	318	99	16	82	25.2036	90.0036	GPS	10	2007	10	2007	25	0	0	0	RDT
Asia	Haque	2007	Journal	Bangladesh	89	37	60	119	99	1	75	25.1858	90.0944	GPS	10	2007	10	2007	25	0	0	0	RDT
Asia	Haque	2007	Journal	Bangladesh	89	37	60	835	99	1	80	25.1994	90.125	GPS	10	2007	10	2007	25	0	0	0	RDT
Asia	Haque	2007	Journal	Bangladesh	72	40	95	961	99	2	75	25.1419	90.9258	GPS	11	2007	12	2007	25	0	0	0	RDT
Asia	Haque	2007	Journal	Bangladesh	72	40	47	655	03	2	75	25.1133	90.8517	GPS	11	2007	12	2007	25	0	0	0	RDT
Asia	Haque	2007	Journal	Bangladesh	72	40	35	194	02	1	70	25.0958	90.9575	GPS	11	2007	12	2007	25	0	0	0	RDT
Asia	Haque	2007	Journal	Bangladesh	72	40	35	578	99	4	50	25.0778	90.8944	GPS	11	2007	12	2007	25	0	0	0	RDT
Asia	Haque	2007	Journal	Bangladesh	72	40	95	705	06	6	60	25.1289	90.8842	GPS	11	2007	12	2007	25	0	0	0	RDT
Asia	Haque	2007	Journal	Bangladesh	72	40	83	439	99	2	75	25.0361	90.8628	GPS	11	2007	12	2007	50	0	0	0	RDT
Asia	Haque	2007	Journal	Bangladesh	72	40	11	083	01	3	70	25.035	90.9164	GPS	11	2007	12	2007	25	0	0	0	RDT
Asia	Haque	2007	Journal	Bangladesh	72	40	59	844	99	7	70	25.0719	90.8969	GPS	11	2007	12	2007	25	0	0	0	RDT
Asia	Haque	2007	Journal	Bangladesh	72	40	47	478	02	1	70	25.1511	90.8347	GPS	11	2007	12	2007	25	0	0	0	RDT
Asia	Haque	2007	Journal	Bangladesh	72	40	83	850	01	1	70	24.9861	90.9044	GPS	11	2007	12	2007	25	0	0	0	RDT
Asia	Haque	2007	Journal	Bangladesh	72	40	95	172	06	8	50	25.1206	90.955	GPS	11	2007	12	2007	25	0	0	0	RDT
Asia	Haque	2007	Journal	Bangladesh	72	40	11	361	99	4	70	25.0406	90.8692	GPS	11	2007	12	2007	25	0	0	0	RDT
Asia	Haque	2007	Journal	Bangladesh	72	40	35	700	99	3	80	25.0719	90.8981	GPS	11	2007	12	2007	25	0	0	0	RDT
Asia	Haque	2007	Journal	Bangladesh	72	40	35	289	99	5	70	25.0467	90.8458	GPS	11	2007	12	2007	25	0	0	0	RDT
Asia	Haque	2007	Journal	Bangladesh	72	40	23	678	99	9	85	25.0258	90.7569	GPS	11	2007	12	2007	25	0	0	0	RDT
Asia	Haque	2007	Journal	Bangladesh	72	40	71	589	99	5	80	25.0981	90.8083	GPS	11	2007	12	2007	25	0	0	0	RDT
Asia	Haque	2007	Journal	Bangladesh	72	40	71	739	99	10	70	25.105	90.7769	GPS	11	2007	12	2007	50	0	0	0	RDT
Asia	Haque	2007	Journal	Bangladesh	72	18	25	728	99	1	70	25.0327	90.6475	GPS	11	2007	12	2007	25	0	0	0	RDT
Asia	Haque	2007	Journal	Bangladesh	72	40	71	739	99	10	70	25.1012	90.7712	GPS	11	2007	12	2007	25	0	0	0	RDT
Asia	Haque	2007	Journal	Bangladesh	72	18	77	451	01	4	75	25.0877	90.6833	GPS	11	2007	12	2007	25	0	0	0	RDT
Asia	Haque	2007	Journal	Bangladesh	72	40	23	150	99	1	80	25.0437	90.7948	GPS	11	2007	12	2007	25	0	0	0	RDT
Asia	Haque	2007	Journal	Bangladesh	72	18	77	480	03	8	70	25.0645	90.6653	GPS	11	2007	12	2007	25	0	0	0	RDT
Asia	Haque	2007	Journal	Bangladesh	72	40	23	917	99	3	100	25.0392	90.752	GPS	11	2007	12	2007	25	0	0	0	RDT
Asia	Haque	2007	Journal	Bangladesh	72	40	23	605	99	3	75	25.0398	90.834	GPS	11	2007	12	2007	25	0	0	0	RDT
Asia	Haque	2007	Journal	Bangladesh	72	40	71	111	99	2	75	25.0827	90.802	GPS	11	2007	12	2007	25	0	0	0	RDT
Asia	Haque	2007	Journal	Bangladesh	72	18	17	543	99	5	80	25.0798	90.6881	GPS	11	2007	12	2007	25	0	0	0	RDT
Asia	Haque	2007	Journal	Bangladesh	72	40	71	722	99	10	80	25.129	90.8058	GPS	11	2007	12	2007	25	0	0	0	RDT
Asia	Haque	2007	Journal	Bangladesh	72	18	17	232	99	9	75	25.0881	90.6838	GPS	11	2007	12	2007	25	0	0	0	RDT
Asia	Haque	2007	Journal	Bangladesh	61	16	31	528	99	2	75	25.1557	90.5287	GPS	10	2007	10	2007	50	0	0	0	RDT
Asia	Haque	2007	Journal	Bangladesh	61	16	36	421	99	3	70	25.0785	90.546	GPS	10	2007	10	2007	50	0	0	1	RDT
Asia	Haque	2007	Journal	Bangladesh	61	16	42	349	99	5	75	25.1158	90.5932	GPS	10	2007	10	2007	75	0	0	0	RDT
Asia	Haque	2007	Journal	Bangladesh	61	16	47	567	04	9	70	25.0648	90.5384	GPS	10	2007	10	2007	50	0	0	0	RDT
Asia	Haque	2007	Journal	Bangladesh	61	16	10	654	03	3	70	25.0969	90.4531	GPS	10	2007	10	2007	50	0	0	0	RDT
Asia	Haque	2007	Journal	Bangladesh	61	16	10	860	01	1	48	25.0763	90.4608	GPS	10	2007	10	2007	75	0	0	0	RDT
Asia	Haque	2007	Journal	Bangladesh	61	16	10	053	01	1	65	25.0986	90.473	GPS	10	2007	10	2007	25	0	0	0	RDT
Asia	Haque	2007	Journal	Bangladesh	61	16	10	286	08	3	69	25.1054	90.4728	GPS	10	2007	10	2007	25	0	0	0	RDT
Asia	Haque	2007	Journal	Bangladesh	61	24	20	877	99	7	80	25.1626	90.3214	GPS	10	2007	10	2007	75	0	0	0	RDT
Asia	Haque	2007	Journal	Bangladesh	61	24	40	988	01	1	65	25.0296	90.2824	GPS	10	2007	10	2007	75	0	0	2	RDT
Asia	Haque	2007	Journal	Bangladesh	61	24	40	988	02	4	90	25.0235	90.2874	GPS	10	2007	10	2007	25	0	0	0	RDT
Asia	Haque	2007	Journal	Bangladesh	61	24	33	278	99	2	65	25.0658	90.3361	GPS	10	2007	10	2007	50	0	0	0	RDT
Asia	Haque	2008	Journal	Bangladesh	61	24	33	655	99	2	65	25.0575	90.329	GPS	10	2007	10	2007	25	0	0	1	RDT
Asia	Haque	2007	Journal	Bangladesh	61	24	33	296	01	1	75	25.0717	90.3417	GPS	10	2007	10	2007	25	0	0	0	RDT
Asia	Haque	2008	Journal	Bangladesh	61	24	33	296	02	6	66	25.0628	90.3477	GPS	10	2007	10	2007	75	0	0	0	RDT
Asia	Haque	2007	Journal	Bangladesh	49	79	11	418	99	9	71	25.5633	89.7836	GPS	10	2007	11	2007	25	0	0	0	RDT
Asia	Haque	2007	Journal	Bangladesh	49	79	11	052	03	1	80	25.6458	89.8225	GPS	10	2007	11	2007	25	1	0	0	RDT
Asia	Haque	2007	Journal	Bangladesh	49	79	11	314	01	3	100	25.6539	89.8025	GPS	10	2007	11	2007	50	0	0	0	RDT
Asia	Haque	2007	Journal	Bangladesh	49	79	11	157	02	4	70	25.5739	89.8194	GPS	10	2007	11	2007	25	0	0	0	RDT
Asia	Haque	2007	Journal	Bangladesh	49	79	23	366	01	2	65	25.6556	89.8511	GPS	10	2007	11	2007	25	0	0	0	RDT
Asia	Haque	2007	Journal	Bangladesh	49	79	35	706	02	6	50	25.4911	89.8044	GPS	10	2007	11	2007	25	0	0	0	RDT
Asia	Haque	2007	Journal	Bangladesh	49	79	23	994	01	5	60	25.6119	89.8142	GPS	10	2007	11	2007	25	0	0	0	RDT
Asia	Haque	2007	Journal	Bangladesh	49	79	23	994	05	1	75	25.6086	89.8494	GPS	10	2007	11	2007	25	0	0	0	RDT
Asia	Haque	2007	Journal	Bangladesh	49	79	23	576	04	4	78	25.6483	89.8222	GPS	10	2007	11	2007	25	0	0	0	RDT
Asia	Haque	2007	Journal	Bangladesh	49	79	83	968	02	8	73	25.6692	89.8553	GPS	10	2007	11	2007	25	0	0	0	RDT
Asia	Haque	2007	Journal	Bangladesh	49	79	71	864	01	10	60	25.6014	89.8386	GPS	10	2007	11	2007	25	0	0	0	RDT
Asia	Haque	2007	Journal	Bangladesh	49	08	19	087	01	3	70	25.5584	89.8677	GPS	10	2007	11	2007	25	0	0	0	RDT
Asia	Haque	2007	Journal	Bangladesh	49	79	71	864	03	7	65	25.479	89.8177	GPS	10	2007	11	2007	25	0	0	0	RDT
Asia	Haque	2007	Journal	Bangladesh	49	79	71	340	12	12	77	25.5614	89.8618	GPS	10	2007	11	2007	50	0	0	0	RDT
Asia	Haque	2007	Journal	Bangladesh	49	79	71	340	10	15	70	25.5653	89.8574	GPS	10	2007	11	2007	25	0	0	0	RDT
Asia	Haque	2007	Journal	Bangladesh	49	79	83	968	01	2	82	25.5458	89.8189	GPS	10	2007	11	2007	25	0	0	0	RDT
Asia	Haque	2007	Journal	Bangladesh	49	08	76	117	04	12	75	25.5397	89.8169	GPS	10	2007	11	2007	25	0	0	0	RDT
Asia	Haque	2007	Journal	Bangladesh	49	08	57	819	04	12	75	25.5404	89.8153	GPS	10	2007	11	2007	25	0	0	0	RDT
Asia	Haque	2007	Journal	Bangladesh	49	08	19	790	01	12	60	25.6014	89.8386	GPS	10	2007	11	2007	50	0	0	0	RDT
Asia	Haque	2007	Journal	Bangladesh	49	08	57	819	05	14	75	25.4041	89.7122	GPS	10	2007	11	2007	25	0	0	0	RDT
Asia	Haque	2007	Journal	Bangladesh	49	08	57	819	01	17	52	25.4711	89.7674	GPS	10	2007	11	2007	50	0	0	0	RDT
Asia	Haque	2007	Journal	Bangladesh	49	08	19	790	02	6	65	25.4501	89.7873	GPS	10	2007	11	2007	25	0	0	0	RDT
Asia	Haque	2007	Journal	Bangladesh	49	79	11	052	05	13	60	25.4637	89.7716	GPS	10	2007	11	2007	25	0	0	0	RDT
Asia	Haque	2007	Journal	Bangladesh	49	79	11	052	06	4	85	25.4453	89.787	GPS	10	2007	11	2007	25	1	0	0	RDT
Asia	Haque	2007	Journal	Bangladesh	49	79	11	811	02	1	65	25.4858	89.7663	GPS	10	2007	11	2007	25	0	0	0	RDT
Asia	Haque	2007	Journal	Bangladesh	49	79	71	340	05	7	80	25.6119	89.8103	GPS	10	2007	11	2007	25	0	0	0	RDT
Asia	Haque	2007	Journal	Bangladesh	58	80	73	419	01	4	70	24.4856	91.8953	GPS	11	2007	12	2007	25	0	0	0	RDT
Asia	Haque	2007	Journal	Bangladesh	58	65	35	120	02	9	70	24.3961	91.9553	GPS	11	2007	12	2007	25	0	0	0	RDT
Asia	Haque	2007	Journal	Bangladesh	58	65	89	914	01	5	70	24.3367	91.9797	GPS	11	2007	12	2007	25	0	0	0	RDT
Asia	Haque	2007	Journal	Bangladesh	58	65	53	621	01	6	55	24.5394	92.0208	GPS	11	2007	12	2007	25	0	0	0	RDT
Asia	Haque	2007	Journal	Bangladesh	58	65	71	839	05	10	81	24.4089	91.9972	GPS	11	2007	12	2007	25	0	0	0	RDT
Asia	Haque	2007	Journal	Bangladesh	58	80	10	831	04	4	55	24.6286	91.8436	GPS	11	2007	12	2007	25	0	0	0	RDT
Asia	Haque	2007	Journal	Bangladesh	58	80	21	781	02	10	70	24.4881	91.8425	GPS	11	2007	12	2007	25	0	0	0	RDT
Asia	Haque	2007	Journal	Bangladesh	58	14	29	399	01	2	59	24.7242	92.2017	GPS	11	2007	12	2007	25	0	0	0	RDT
Asia	Haque	2007	Journal	Bangladesh	58	14	80	139	01	8	82	24.6614	92.1969	GPS	11	2007	12	2007	25	0	0	0	RDT
Asia	Haque	2007	Journal	Bangladesh	58	80	52	248	99	1	75	24.5636	91.8303	GPS	11	2007	12	2007	25	0	0	0	RDT
Asia	Haque	2007	Journal	Bangladesh	58	80	52	184	99	9	71	24.525	91.8178	GPS	11	2007	12	2007	25	0	0	0	RDT
Asia	Haque	2007	Journal	Bangladesh	58	65	71	839	06	7	80	24.4089	91.9972	GPS	11	2007	12	2007	25	0	0	0	RDT
Asia	Haque	2007	Journal	Bangladesh	58	14	85	114	99	8	70	24.7019	92.1231	GPS	11	2007	12	2007	25	0	0	0	RDT
Asia	Haque	2007	Journal	Bangladesh	58	14	94	652	05	6	85	24.7247	92.2186	GPS	11	2007	12	2007	25	0	0	0	RDT
Asia	Haque	2007	Journal	Bangladesh	58	14	29	614	99	2	80	24.5091	91.7808	GPS	11	2007	12	2007	25	0	0	0	RDT
Asia	Haque	2007	Journal	Bangladesh	58	74	29	994	01	16	75	24.5104	91.7807	GPS	11	2007	12	2007	25	0	0	0	RDT
Asia	Haque	2007	Journal	Bangladesh	58	74	36	953	99	8	80	24.4455	91.7327	GPS	11	2007	12	2007	25	0	0	0	RDT
Asia	Haque	2007	Journal	Bangladesh	58	74	51	388	07	5	80	24.4858	91.7194	GPS	11	2007	12	2007	25	0	0	0	RDT
Asia	Haque	2007	Journal	Bangladesh	58	74	65	875	01	2	70	24.5897	91.6692	GPS	11	2007	12	2007	25	0	0	0	RDT
Asia	Haque	2007	Journal	Bangladesh	58	74	36	409	99	13	80	24.4113	91.7578	GPS	11	2007	12	2007	25	0	0	0	RDT
Asia	Haque	2007	Journal	Bangladesh	58	83	19	018	02	6	85	24.3047	91.6719	GPS	11	2007	12	2007	25	0	0	0	RDT
Asia	Haque	2007	Journal	Bangladesh	58	83	19	705	99	12	75	24.3309	91.636	GPS	11	2007	12	2007	25	0	0	0	RDT
Asia	Haque	2007	Journal	Bangladesh	58	83	28	135	99	1	90	24.3911	91.73	GPS	11	2007	12	2007	25	0	0	0	RDT
Asia	Haque	2007	Journal	Bangladesh	58	83	15	081	02	6	60	24.2741	91.7618	GPS	11	2007	12	2007	25	1	0	0	RDT
Asia	Haque	2007	Journal	Bangladesh	58	83	47	253	99	2	70	24.2778	91.7654	GPS	11	2007	12	2007	25	0	0	0	RDT
Asia	Haque	2007	Journal	Bangladesh	58	56	17	950	03	5	75	24.4447	91.6321	GPS	11	2007	12	2007	25	0	0	0	RDT
Asia	Haque	2007	Journal	Bangladesh	58	56	47	968	02	3	80	24.2684	91.7244	GPS	11	2007	12	2007	25	1	0	0	RDT
Asia	Haque	2007	Journal	Bangladesh	58	56	76	079	99	7	70	24.4789	91.7984	GPS	11	2007	12	2007	25	0	0	0	RDT
Asia	Haque	2007	Journal	Bangladesh	58	56	76	598	99	5	60	24.411	91.8023	GPS	11	2007	12	2007	25	0	0	0	RDT
Asia	Haque	2007	Journal	Bangladesh	58	83	85	994	01	1	62	24.3061	91.7153	GPS	11	2007	12	2007	25	0	0	0	RDT
Asia	Haque	2007	Journal	Bangladesh	90	18	17	530	01	2	70	25.0043	91.5068	GPS	10	2007	11	2007	25	0	0	0	RDT
Asia	Haque	2007	Journal	Bangladesh	90	18	34	074	01	3	90	25.0842	91.5429	GPS	10	2007	11	2007	25	0	0	0	RDT
Asia	Haque	2007	Journal	Bangladesh	90	23	11	404	99	5	70	25.012	91.0539	GPS	10	2007	11	2007	50	0	0	0	RDT
Asia	Haque	2007	Journal	Bangladesh	90	23	52	395	01	19	62	25.0529	91.4652	GPS	10	2007	11	2007	25	2	0	0	RDT
Asia	Haque	2007	Journal	Bangladesh	90	23	57	006	04	4	80	25.1096	90.994	GPS	10	2007	11	2007	25	0	0	0	RDT
Asia	Haque	2007	Journal	Bangladesh	90	23	57	290	02	4	65	25.1377	91.2399	GPS	10	2007	11	2007	25	0	0	0	RDT
Asia	Haque	2007	Journal	Bangladesh	90	23	57	564	02	2	75	24.9357	90.9831	GPS	10	2007	11	2007	25	1	0	2	RDT
Asia	Haque	2007	Journal	Bangladesh	90	23	76	611	01	8	70	25.0415	90.9864	GPS	10	2007	11	2007	25	0	0	0	RDT
Asia	Haque	2007	Journal	Bangladesh	90	32	23	402	03	2	55	24.9627	90.9824	GPS	10	2007	11	2007	25	0	0	0	RDT
Asia	Haque	2007	Journal	Bangladesh	90	32	57	622	02	6	50	25.0916	91.2938	GPS	10	2007	11	2007	25	0	0	0	RDT
Asia	Haque	2007	Journal	Bangladesh	90	32	66	782	02	2	60	25.1458	91.2913	GPS	10	2007	11	2007	25	0	0	0	RDT
Asia	Haque	2007	Journal	Bangladesh	90	32	76	357	01	9	65	25.0403	91.1476	GPS	10	2007	11	2007	25	0	0	0	RDT
Asia	Haque	2007	Journal	Bangladesh	90	32	90	715	01	4	55	25.1559	91.1825	GPS	10	2007	11	2007	25	0	0	0	RDT
Asia	Haque	2007	Journal	Bangladesh	90	33	61	106	01	2	65	25.1854	91.0871	GPS	10	2007	11	2007	25	0	0	0	RDT
Asia	Haque	2007	Journal	Bangladesh	90	33	67	717	01	4	75	25.1571	91.2103	GPS	10	2007	11	2007	25	0	0	0	RDT
Asia	Haque	2007	Journal	Bangladesh	90	33	78	275	02	4	75	25.0282	91.443	GPS	10	2007	11	2007	25	0	0	0	RDT
Asia	Haque	2007	Journal	Bangladesh	90	89	10	490	99	11	70	24.9454	91.3982	GPS	10	2007	11	2007	25	0	0	0	RDT
Asia	Haque	2007	Journal	Bangladesh	90	89	11	038	99	6	50	24.9901	91.3273	GPS	10	2007	11	2007	25	0	0	0	RDT
Asia	Haque	2007	Journal	Bangladesh	90	89	11	143	99	4	80	24.9484	91.4715	GPS	10	2007	11	2007	25	0	0	0	RDT
Asia	Haque	2007	Journal	Bangladesh	90	89	11	676	99	5	60	24.9271	91.4587	GPS	10	2007	11	2007	25	0	0	0	RDT
Asia	Haque	2007	Journal	Bangladesh	90	89	33	441	02	1	75	24.8409	91.4801	GPS	10	2007	11	2007	25	0	0	0	RDT
Asia	Haque	2007	Journal	Bangladesh	90	89	50	791	01	8	75	24.8394	91.4485	GPS	10	2007	11	2007	25	2	0	0	RDT
Asia	Haque	2007	Journal	Bangladesh	90	89	78	273	01	2	65	25.0251	91.6079	GPS	10	2007	11	2007	25	0	0	0	RDT
Asia	Haque	2007	Journal	Bangladesh	90	89	90	222	02	7	55	25.0017	91.6587	GPS	10	2007	11	2007	25	0	0	0	RDT
Asia	Haque	2007	Journal	Bangladesh	90	89	94	767	02	7	65	24.9628	91.678	GPS	10	2007	11	2007	25	0	0	0	RDT
Asia	Haque	2007	Journal	Bangladesh	90	92	33	820	01	4	70	24.8376	91.5893	GPS	10	2007	11	2007	25	0	0	0	RDT
Asia	Haque	2007	Journal	Bangladesh	90	92	43	323	99	8	75	24.923	91.5613	GPS	10	2007	11	2007	25	0	0	0	RDT
Asia	Haque	2007	Journal	Bangladesh	90	92	92	432	99	5	50	24.864	91.4818	GPS	10	2007	11	2007	25	1	0	0	RDT
Asia	Haque	2007	Journal	Bangladesh	90	92	82	019	02	3	100	24.989	91.6695	GPS	10	2007	11	2007	25	0	0	0	RDT
Asia	Haque	2007	Journal	Bangladesh	15	04	57	766	99	6	60	22.4742	91.8023	GPS	10	2007	10	2007	25	0	0	0	RDT
Asia	Haque	2007	Journal	Bangladesh	15	04	76	524	99	8	50	22.4227	91.834	GPS	10	2007	10	2007	25	0	0	0	RDT
Asia	Haque	2007	Journal	Bangladesh	15	08	25	608	99	10	70	22.4062	91.8463	GPS	10	2007	10	2007	25	1	0	0	RDT
Asia	Haque	2007	Journal	Bangladesh	15	08	37	994	14	3	75	22.7511	91.7401	GPS	10	2007	10	2007	25	0	0	0	RDT
Asia	Haque	2007	Journal	Bangladesh	15	08	69	138	99	8	59	22.4819	91.9573	GPS	10	2007	10	2007	25	0	0	0	RDT
Asia	Haque	2007	Journal	Bangladesh	15	08	69	760	99	5	70	22.646	91.8562	GPS	10	2007	10	2007	25	0	0	0	RDT
Asia	Haque	2007	Journal	Bangladesh	15	08	75	939	99	4	63	22.4058	91.9946	GPS	10	2007	10	2007	25	0	0	0	RDT
Asia	Haque	2007	Journal	Bangladesh	15	12	85	497	99	1	62	22.5806	91.6881	GPS	10	2007	10	2007	25	0	0	0	RDT
Asia	Haque	2007	Journal	Bangladesh	15	33	19	759	99	3	70	22.3841	91.761	GPS	10	2007	10	2007	25	0	0	0	RDT
Asia	Haque	2007	Journal	Bangladesh	15	33	61	441	99	9	80	22.3931	91.7555	GPS	10	2007	10	2007	25	1	0	0	RDT
Asia	Haque	2007	Journal	Bangladesh	15	37	17	526	99	6	82	22.8622	91.4853	GPS	10	2007	10	2007	25	0	0	0	RDT
Asia	Haque	2007	Journal	Bangladesh	15	37	35	838	99	1	75	22.9023	91.6296	GPS	10	2007	10	2007	25	0	0	0	RDT
Asia	Haque	2007	Journal	Bangladesh	15	37	89	546	99	6	55	22.8852	91.6251	GPS	10	2007	10	2007	25	0	0	0	RDT
Asia	Haque	2007	Journal	Bangladesh	15	47	18	158	99	2	66	22.8689	91.4991	GPS	10	2007	10	2007	25	1	0	0	RDT
Asia	Haque	2007	Journal	Bangladesh	15	47	43	766	99	3	65	21.9881	92.1189	GPS	10	2007	10	2007	25	0	0	0	RDT
Asia	Haque	2007	Journal	Bangladesh	15	47	43	792	99	16	70	22.1622	91.9144	GPS	10	2007	10	2007	25	0	0	0	RDT
Asia	Haque	2007	Journal	Bangladesh	15	53	35	864	02	1	62	22.5439	92.0778	GPS	10	2007	10	2007	25	1	0	0	RDT
Asia	Haque	2007	Journal	Bangladesh	15	53	35	864	03	4	68	22.3525	92.1361	GPS	10	2007	10	2007	25	0	1	0	RDT
Asia	Haque	2007	Journal	Bangladesh	15	53	77	613	99	2	65	21.9108	91.9106	GPS	10	2007	10	2007	25	0	0	0	RDT
Asia	Haque	2007	Journal	Bangladesh	15	53	95	827	99	1	60	22.1086	91.9256	GPS	10	2007	10	2007	25	0	0	0	RDT
Asia	Haque	2007	Journal	Bangladesh	15	61	94	479	99	10	75	22.1617	91.9314	GPS	10	2007	10	2007	25	0	0	0	RDT
Asia	Haque	2007	Journal	Bangladesh	15	70	43	912	99	4	63	22.0133	91.9561	GPS	10	2007	10	2007	25	1	0	0	RDT
Asia	Haque	2007	Journal	Bangladesh	15	70	69	760	03	11	70	22.0925	92.0469	GPS	10	2007	10	2007	25	0	0	0	RDT
Asia	Haque	2007	Journal	Bangladesh	15	74	50	447	99	1	65	22.0733	92.0481	GPS	10	2007	10	2007	25	0	0	0	RDT
Asia	Haque	2007	Journal	Bangladesh	15	82	91	906	01	4	82	22.0072	92.0375	GPS	10	2007	10	2007	25	0	0	0	RDT
Asia	Haque	2007	Journal	Bangladesh	15	82	94	748	03	2	70	21.9864	92.1497	GPS	10	2007	10	2007	25	1	0	0	RDT
Asia	Haque	2007	Journal	Bangladesh	15	86	19	490	99	2	72	22.2253	91.9294	GPS	10	2007	10	2007	50	0	0	0	RDT
Asia	Haque	2007	Journal	Bangladesh	15	86	66	193	99	4	65	22.1722	91.8556	GPS	10	2007	10	2007	25	0	0	0	RDT
Asia	Haque	2007	Journal	Bangladesh	15	86	66	920	99	6	55	22.2789	91.8803	GPS	10	2007	10	2007	25	0	0	0	RDT
Asia	Haque	2007	Journal	Bangladesh	22	16	12	183	01	10	65	21.6571	92.0917	GPS	10	2007	10	2007	25	1	0	0	RDT
Asia	Haque	2007	Journal	Bangladesh	22	16	16	091	01	3	75	21.8142	92.0365	GPS	10	2007	10	2007	25	0	0	0	RDT
Asia	Haque	2007	Journal	Bangladesh	22	16	16	719	01	6	70	21.6751	92.0657	GPS	10	2007	10	2007	25	0	0	0	RDT
Asia	Haque	2007	Journal	Bangladesh	22	16	33	030	01	3	66	21.6691	92.0626	GPS	10	2007	10	2007	25	1	0	2	RDT
Asia	Haque	2007	Journal	Bangladesh	22	16	33	887	01	7	67	21.7769	92.0794	GPS	10	2007	10	2007	25	0	0	0	RDT
Asia	Haque	2007	Journal	Bangladesh	22	66	47	076	01	4	60	21.7669	92.3358	GPS	10	2007	10	2007	25	1	0	0	RDT
Asia	Haque	2008	Journal	Bangladesh	22	94	63	612	01	3	70	21.1333	92.1808	GPS	10	2007	10	2007	25	1	0	0	RDT
Asia	Haque	2007	Journal	Bangladesh	22	16	11	076	02	7	70	21.8288	92.0654	GPS	10	2007	10	2007	25	0	0	0	RDT
Asia	Haque	2007	Journal	Bangladesh	22	16	11	918	02	3	90	21.6877	92.075	GPS	10	2007	10	2007	25	0	0	0	RDT
Asia	Haque	2007	Journal	Bangladesh	22	16	33	290	02	1	84	21.6538	92.0738	GPS	10	2007	10	2007	25	1	1	0	RDT
Asia	Haque	2007	Journal	Bangladesh	22	16	72	581	02	1	70	21.7058	91.9526	GPS	10	2007	10	2007	25	0	0	0	RDT
Asia	Haque	2007	Journal	Bangladesh	22	45	13	110	02	3	67	21.2981	92.0725	GPS	10	2007	10	2007	25	0	0	0	RDT
Asia	Haque	2007	Journal	Bangladesh	22	45	27	221	02	4	65	21.4414	92.1906	GPS	10	2007	10	2007	25	0	0	0	RDT
Asia	Haque	2007	Journal	Bangladesh	22	49	47	417	02	13	70	21.4928	92.0456	GPS	10	2007	10	2007	25	1	0	0	RDT
Asia	Haque	2007	Journal	Bangladesh	22	49	59	545	02	5	70	21.7492	91.9525	GPS	10	2007	10	2007	25	0	0	0	RDT
Asia	Haque	2007	Journal	Bangladesh	22	16	10	015	03	5	60	21.731	92.0575	GPS	10	2007	10	2007	25	0	0	0	RDT
Asia	Haque	2007	Journal	Bangladesh	22	16	33	290	03	7	63	21.7912	92.1959	GPS	10	2007	10	2007	25	0	0	0	RDT
Asia	Haque	2007	Journal	Bangladesh	22	90	79	912	03	1	65	21.2953	92.0517	GPS	10	2007	10	2007	25	3	0	0	RDT
Asia	Haque	2007	Journal	Bangladesh	22	16	67	336	04	8	55	21.6123	92.0522	GPS	10	2007	10	2007	25	0	0	0	RDT
Asia	Haque	2007	Journal	Bangladesh	22	24	83	366	04	2	70	21.5761	92.1578	GPS	10	2007	10	2007	25	0	1	0	RDT
Asia	Haque	2007	Journal	Bangladesh	22	49	35	866	04	5	55	21.5269	91.9556	GPS	10	2007	10	2007	25	0	0	0	RDT
Asia	Haque	2007	Journal	Bangladesh	22	66	28	331	04	2	110	21.065	92.2325	GPS	10	2007	10	2007	25	0	0	0	RDT
Asia	Haque	2007	Journal	Bangladesh	22	66	85	102	05	5	70	21.6269	91.9236	GPS	10	2007	10	2007	25	0	0	0	RDT
Asia	Haque	2007	Journal	Bangladesh	22	16	33	290	07	1	60	21.8297	91.9978	GPS	10	2007	10	2007	25	0	1	0	RDT
Asia	Haque	2007	Journal	Bangladesh	22	90	47	663	07	1	64	21.5961	91.9272	GPS	10	2007	10	2007	25	0	0	0	RDT
Asia	Haque	2007	Journal	Bangladesh	22	16	33	290	08	1	70	21.8376	91.9904	GPS	10	2007	10	2007	25	0	0	0	RDT
Asia	Haque	2007	Journal	Bangladesh	22	24	10	052	08	1	60	21.4072	92.0561	GPS	10	2007	10	2007	25	0	0	0	RDT
Asia	Haque	2007	Journal	Bangladesh	22	49	47	417	14	6	87	21.9653	91.8708	GPS	10	2007	10	2007	25	1	0	0	RDT
Asia	Haque	2007	Journal	Bangladesh	22	16	27	214	99	2	65	21.6597	92.0578	GPS	10	2007	10	2007	25	2	0	0	RDT
Asia	Haque	2007	Journal	Bangladesh	22	66	57	280	99	2	60	21.6683	91.9225	GPS	10	2007	10	2007	25	0	0	0	RDT
Asia	Haque	2007	Journal	Bangladesh	36	26	28	180	01	7	65	24.1077	91.3583	GPS	10	2007	11	2007	25	0	0	0	RDT
Asia	Haque	2007	Journal	Bangladesh	36	26	28	247	01	7	70	24.2352	91.3685	GPS	10	2007	11	2007	25	0	0	0	RDT
Asia	Haque	2007	Journal	Bangladesh	36	26	47	012	01	2	85	24.047	91.3463	GPS	10	2007	11	2007	25	0	0	0	RDT
Asia	Haque	2007	Journal	Bangladesh	36	26	66	301	01	3	70	24.0049	91.3474	GPS	10	2007	11	2007	25	0	0	0	RDT
Asia	Haque	2007	Journal	Bangladesh	36	26	66	940	01	4	90	24.2562	91.3797	GPS	10	2007	11	2007	25	3	0	0	RDT
Asia	Haque	2007	Journal	Bangladesh	36	71	17	445	01	7	90	24.2844	91.4761	GPS	10	2007	11	2007	25	0	0	0	RDT
Asia	Haque	2007	Journal	Bangladesh	36	71	25	973	01	1	90	24.3364	91.4214	GPS	10	2007	11	2007	25	0	0	0	RDT
Asia	Haque	2007	Journal	Bangladesh	36	71	51	434	01	8	75	24.3544	91.3886	GPS	10	2007	11	2007	25	0	0	0	RDT
Asia	Haque	2007	Journal	Bangladesh	36	71	60	555	01	9	85	24.4358	91.3081	GPS	10	2007	11	2007	25	0	0	0	RDT
Asia	Haque	2007	Journal	Bangladesh	36	26	28	180	02	2	81	24.0454	91.3666	GPS	10	2007	11	2007	25	0	0	0	RDT
Asia	Haque	2007	Journal	Bangladesh	36	26	57	627	03	11	70	24.0796	91.3483	GPS	10	2007	11	2007	25	2	0	0	RDT
Asia	Haque	2007	Journal	Bangladesh	36	26	57	838	03	2	60	24.1079	91.3447	GPS	10	2007	11	2007	25	2	0	2	RDT
Asia	Haque	2007	Journal	Bangladesh	36	71	17	445	03	7	75	24.3186	91.5236	GPS	10	2007	11	2007	25	0	0	0	RDT
Asia	Haque	2007	Journal	Bangladesh	36	71	25	582	03	1	70	24.3533	91.5683	GPS	10	2007	11	2007	25	0	0	0	RDT
Asia	Haque	2007	Journal	Bangladesh	36	26	19	530	99	3	85	24.1517	91.3812	GPS	10	2007	11	2007	50	0	0	0	RDT
Asia	Haque	2007	Journal	Bangladesh	36	26	28	434	99	4	70	24.1324	91.3241	GPS	10	2007	11	2007	25	0	0	1	RDT
Asia	Haque	2008	Journal	Bangladesh	36	26	57	235	99	1	70	24.0573	91.3315	GPS	10	2007	11	2007	50	0	0	0	RDT
Asia	Haque	2007	Journal	Bangladesh	36	26	57	319	99	7	80	24.0699	91.3323	GPS	10	2007	11	2007	25	0	0	0	RDT
Asia	Haque	2007	Journal	Bangladesh	36	26	85	982	99	3	81	24.0274	91.3624	GPS	10	2007	11	2007	25	1	0	0	RDT
Asia	Haque	2007	Journal	Bangladesh	36	26	95	603	99	9	65	24.0795	91.3604	GPS	10	2007	11	2007	25	0	0	0	RDT
Asia	Haque	2007	Journal	Bangladesh	36	71	17	865	99	2	75	24.3358	91.5061	GPS	10	2007	11	2007	25	0	0	0	RDT
Asia	Haque	2007	Journal	Bangladesh	36	71	25	090	99	2	80	24.4364	91.6222	GPS	10	2007	11	2007	25	0	0	0	RDT
Asia	Haque	2007	Journal	Bangladesh	36	71	25	758	99	2	70	24.3836	91.3358	GPS	10	2007	11	2007	25	0	0	0	RDT
Asia	Haque	2007	Journal	Bangladesh	36	71	25	786	99	7	88	24.3692	91.3531	GPS	10	2007	11	2007	25	0	0	0	RDT
Asia	Haque	2007	Journal	Bangladesh	36	71	51	654	99	6	70	24.3008	91.3417	GPS	10	2007	11	2007	25	0	0	0	RDT
Asia	Haque	2007	Journal	Bangladesh	36	71	77	054	99	4	75	24.5175	91.3697	GPS	10	2007	11	2007	25	0	0	0	RDT
Asia	Haque	2007	Journal	Bangladesh	36	71	77	937	99	5	81	24.4925	91.5275	GPS	10	2007	11	2007	25	0	0	0	RDT
Asia	Haque	2007	Journal	Bangladesh	36	71	86	472	99	5	70	24.6581	91.7225	GPS	10	2007	11	2007	25	0	0	0	RDT
Asia	Haque	2007	Journal	Bangladesh	03	04	31	142	07	2	86	21.6453	92.3087	GPS	9	2007	10	2007	25	0	0	0	RDT
Asia	Haque	2007	Journal	Bangladesh	03	04	31	142	10	1	70	21.6415	92.3148	GPS	9	2007	10	2007	25	0	0	0	RDT
Asia	Haque	2007	Journal	Bangladesh	03	04	31	284	09	1	40	21.6267	92.3185	GPS	9	2007	10	2007	25	4	1	0	RDT
Asia	Haque	2007	Journal	Bangladesh	03	04	63	426	05	1	74	21.6935	92.2837	GPS	9	2007	10	2007	25	3	1	0	RDT
Asia	Haque	2007	Journal	Bangladesh	03	04	63	852	17	4	60	21.6392	92.318	GPS	9	2007	10	2007	25	0	1	0	RDT
Asia	Haque	2007	Journal	Bangladesh	03	04	63	852	22	1	80	21.8333	92.3167	GPS	9	2007	10	2007	25	1	0	0	RDT
Asia	Haque	2007	Journal	Bangladesh	03	14	31	497	01	1	68	22.2325	92.2467	GPS	9	2007	10	2007	25	0	0	0	RDT
Asia	Haque	2007	Journal	Bangladesh	03	14	47	684	04	5	62	21.6638	92.303	GPS	9	2007	10	2007	25	1	0	0	RDT
Asia	Haque	2007	Journal	Bangladesh	03	51	15	110	09	3	70	22.0594	92.3992	GPS	9	2007	10	2007	25	1	0	0	RDT
Asia	Haque	2007	Journal	Bangladesh	03	51	15	387	02	2	80	22.0597	92.3989	GPS	9	2007	10	2007	25	7	0	0	RDT
Asia	Haque	2007	Journal	Bangladesh	03	51	15	387	32	4	75	21.5833	92.2333	GPS	9	2007	10	2007	25	1	0	0	RDT
Asia	Haque	2007	Journal	Bangladesh	03	51	31	442	12	1	60	21.45	92.3333	GPS	9	2007	10	2007	25	1	1	0	RDT
Asia	Haque	2007	Journal	Bangladesh	03	51	31	442	14	3	70	21.8	92.1667	GPS	9	2007	10	2007	25	0	0	0	RDT
Asia	Haque	2007	Journal	Bangladesh	03	51	31	442	24	1	60	21.8167	92.1333	GPS	9	2007	10	2007	25	1	1	0	RDT
Asia	Haque	2007	Journal	Bangladesh	03	51	31	994	02	2	50	21.725	92.175	GPS	9	2007	10	2007	25	0	0	0	RDT
Asia	Haque	2007	Journal	Bangladesh	03	51	47	497	01	1	83	21.6917	92.1583	GPS	9	2007	10	2007	25	7	0	0	RDT
Asia	Haque	2008	Journal	Bangladesh	03	51	63	166	04	1	65	21.7833	92.225	GPS	9	2007	10	2007	25	1	0	0	RDT
Asia	Haque	2007	Journal	Bangladesh	03	51	63	607	03	10	64	21.8917	92.1417	GPS	9	2007	10	2007	25	0	0	0	RDT
Asia	Haque	2007	Journal	Bangladesh	03	73	57	819	05	2	50	22.2325	92.2467	GPS	9	2007	10	2007	25	5	0	0	RDT
Asia	Haque	2007	Journal	Bangladesh	03	73	57	994	15	6	53	22.2328	92.2467	GPS	9	2007	10	2007	25	1	0	0	RDT
Asia	Haque	2007	Journal	Bangladesh	03	89	57	818	11	3	65	22.172	92.3372	GPS	9	2007	10	2007	25	0	0	0	RDT
Asia	Haque	2007	Journal	Bangladesh	03	89	76	072	04	1	60	22.1648	92.26	GPS	9	2007	10	2007	25	7	0	0	RDT
Asia	Haque	2007	Journal	Bangladesh	03	89	76	306	04	2	76	22.1315	92.2582	GPS	9	2007	10	2007	25	2	0	0	RDT
Asia	Haque	2007	Journal	Bangladesh	03	89	76	994	08	3	65	21.6383	92.317	GPS	9	2007	10	2007	25	7	0	2	RDT
Asia	Haque	2007	Journal	Bangladesh	03	91	76	781	05	9	78	22.0594	92.3992	GPS	9	2007	10	2007	25	2	0	0	RDT
Asia	Haque	2007	Journal	Bangladesh	03	95	19	633	02	10	85	21.8906	92.3906	GPS	9	2007	10	2007	25	6	0	0	RDT
Asia	Haque	2007	Journal	Bangladesh	03	95	19	814	02	5	78	21.8861	92.3867	GPS	9	2007	10	2007	25	5	0	0	RDT
Asia	Haque	2007	Journal	Bangladesh	03	95	19	814	04	4	65	21.8842	92.3917	GPS	9	2007	10	2007	25	0	1	0	RDT
Asia	Haque	2008	Journal	Bangladesh	03	95	57	090	05	5	80	21.8261	92.4392	GPS	9	2007	10	2007	25	3	0	1	RDT
Asia	Haque	2009	Journal	Bangladesh	03	95	57	090	13	2	82	21.8058	92.4517	GPS	9	2007	10	2007	25	5	0	0	RDT
Asia	Haque	2007	Journal	Bangladesh	84	07	23	105	08	5	65	23.0355	92.2323	GPS	9	2007	10	2007	25	4	0	0	RDT
Asia	Haque	2007	Journal	Bangladesh	84	07	23	105	16	9	85	22.5	92.2417	GPS	9	2007	10	2007	25	1	0	0	RDT
Asia	Haque	2007	Journal	Bangladesh	84	07	35	785	03	6	55	22.6833	92.1333	GPS	9	2007	10	2007	25	1	0	0	RDT
Asia	Haque	2007	Journal	Bangladesh	84	07	47	419	05	9	70	22.7946	92.0512	GPS	9	2007	10	2007	25	1	0	0	RDT
Asia	Haque	2007	Journal	Bangladesh	84	07	47	419	07	2	75	23.1149	92.2437	GPS	9	2007	10	2007	25	3	0	0	RDT
Asia	Haque	2007	Journal	Bangladesh	84	07	59	523	01	4	65	23.4167	92.1667	GPS	9	2007	10	2007	25	0	0	0	RDT
Asia	Haque	2007	Journal	Bangladesh	84	07	59	523	04	3	70	23.2114	92.2224	GPS	9	2007	10	2007	25	1	0	0	RDT
Asia	Haque	2007	Journal	Bangladesh	84	07	83	314	01	1	75	23.25	92.1917	GPS	9	2007	10	2007	25	0	0	0	RDT
Asia	Haque	2007	Journal	Bangladesh	84	07	83	314	09	4	80	23.3078	92.1829	GPS	9	2007	10	2007	25	0	0	0	RDT
Asia	Haque	2007	Journal	Bangladesh	84	21	79	852	05	8	83	22.7044	92.2772	GPS	9	2007	10	2007	25	2	0	0	RDT
Asia	Haque	2007	Journal	Bangladesh	84	25	19	796	13	1	58	22.5164	92.0191	GPS	9	2007	10	2007	25	2	0	0	RDT
Asia	Haque	2007	Journal	Bangladesh	84	25	57	398	08	6	76	22.6072	92.0976	GPS	9	2007	10	2007	25	1	0	0	RDT
Asia	Haque	2007	Journal	Bangladesh	84	25	76	695	07	3	60	22.5831	92.2786	GPS	9	2007	10	2007	25	3	0	0	RDT
Asia	Haque	2007	Journal	Bangladesh	84	29	47	980	01	8	70	22.4192	92.3572	GPS	9	2007	10	2007	25	4	0	0	RDT
Asia	Haque	2007	Journal	Bangladesh	84	36	19	994	01	3	65	23.3583	92.3417	GPS	9	2007	10	2007	25	0	0	0	RDT
Asia	Haque	2007	Journal	Bangladesh	84	36	19	994	02	2	55	23.15	92.2	GPS	9	2007	10	2007	25	1	0	0	RDT
Asia	Haque	2008	Journal	Bangladesh	84	36	57	165	04	5	60	22.5708	92.1811	GPS	9	2007	10	2007	25	4	0	0	RDT
Asia	Haque	2007	Journal	Bangladesh	84	36	57	165	05	2	58	22.5708	92.1811	GPS	9	2007	10	2007	25	3	0	0	RDT
Asia	Haque	2007	Journal	Bangladesh	84	36	76	939	02	6	71	23.1	92.25	GPS	9	2007	10	2007	25	0	0	0	RDT
Asia	Haque	2007	Journal	Bangladesh	84	36	86	994	17	2	72	22.5708	92.1811	GPS	9	2007	10	2007	25	2	0	0	RDT
Asia	Haque	2007	Journal	Bangladesh	84	58	27	361	01	1	70	22.9955	92.2299	GPS	9	2007	10	2007	25	0	0	0	RDT
Asia	Haque	2007	Journal	Bangladesh	84	58	60	542	01	1	60	23.0355	92.2323	GPS	9	2007	10	2007	25	0	1	0	RDT
Asia	Haque	2007	Journal	Bangladesh	84	58	67	633	06	1	70	23.2	92.1833	GPS	9	2007	10	2007	25	1	0	0	RDT
Asia	Haque	2007	Journal	Bangladesh	84	78	71	894	01	5	45	22.3611	92.2412	GPS	9	2007	10	2007	25	8	0	1	RDT
Asia	Haque	2007	Journal	Bangladesh	84	87	40	519	03	5	61	22.5236	92.2678	GPS	9	2007	10	2007	25	2	0	0	RDT
Asia	Haque	2007	Journal	Bangladesh	84	87	54	259	04	16	65	22.5711	92.1839	GPS	9	2007	10	2007	25	1	0	0	RDT
Asia	Haque	2007	Journal	Bangladesh	84	87	67	173	04	3	58	22.5261	92.2547	GPS	9	2007	10	2007	25	4	0	0	RDT
Asia	Haque	2007	Journal	Bangladesh	84	87	81	043	03	3	65	22.5425	92.2656	GPS	9	2007	10	2007	25	0	0	0	RDT
Asia	Haque	2008	Journal	Bangladesh	84	87	81	043	04	4	65	22.5261	92.1817	GPS	9	2007	10	2007	25	0	0	0	RDT
Asia	Haque	2009	Journal	Bangladesh	84	87	81	043	05	7	66	22.5261	92.1822	GPS	9	2007	10	2007	25	0	0	0	RDT
Asia	Haque	2007	Journal	Bangladesh	46	43	31	165	03	1	70	23.2661	92.0556	GPS	9	2007	10	2007	25	0	0	0	RDT
Asia	Haque	2007	Journal	Bangladesh	46	43	31	663	05	5	73	23.2966	92.0359	GPS	9	2007	10	2007	25	2	0	0	RDT
Asia	Haque	2007	Journal	Bangladesh	46	43	47	464	17	4	77	23.2792	92.0551	GPS	9	2007	10	2007	25	0	0	0	RDT
Asia	Haque	2007	Journal	Bangladesh	46	43	79	085	13	3	65	23.185	92.0678	GPS	9	2007	10	2007	25	10	0	1	RDT
Asia	Haque	2007	Journal	Bangladesh	46	43	79	085	14	3	75	23.2044	92.0808	GPS	9	2007	10	2007	25	7	0	0	RDT
Asia	Haque	2007	Journal	Bangladesh	46	43	79	085	26	2	75	23.2281	92.0583	GPS	9	2007	10	2007	25	4	0	1	RDT
Asia	Haque	2007	Journal	Bangladesh	46	43	79	490	04	2	65	23.1722	92.1519	GPS	9	2007	10	2007	25	13	0	0	RDT
Asia	Haque	2007	Journal	Bangladesh	46	43	79	945	12	1	67	23.0955	92.1414	GPS	9	2007	10	2007	25	6	0	0	RDT
Asia	Haque	2007	Journal	Bangladesh	46	49	47	229	01	3	70	23.0785	91.9994	GPS	9	2007	10	2007	25	0	0	0	RDT
Asia	Haque	2007	Journal	Bangladesh	46	49	63	918	23	3	83	23.0195	92.0021	GPS	9	2007	10	2007	25	4	1	0	RDT
Asia	Haque	2007	Journal	Bangladesh	46	65	15	382	10	8	60	22.9361	92.0294	GPS	9	2007	10	2007	25	4	0	0	RDT
Asia	Haque	2007	Journal	Bangladesh	46	65	63	688	06	8	70	22.9325	92.0428	GPS	9	2007	10	2007	25	0	1	0	RDT
Asia	Haque	2007	Journal	Bangladesh	46	65	63	688	14	1	70	22.9356	92.0425	GPS	9	2007	10	2007	25	1	0	0	RDT
Asia	Haque	2007	Journal	Bangladesh	46	65	79	153	05	5	65	22.9058	91.9442	GPS	9	2007	10	2007	25	6	0	0	RDT
Asia	Haque	2007	Journal	Bangladesh	46	67	63	426	15	3	70	22.8008	91.78	GPS	9	2007	10	2007	25	1	1	0	RDT
Asia	Haque	2007	Journal	Bangladesh	46	70	35	271	01	3	75	23.0092	91.8681	GPS	9	2007	10	2007	25	5	0	0	RDT
Asia	Haque	2008	Journal	Bangladesh	46	70	35	271	03	3	42	23.0078	91.8703	GPS	9	2007	10	2007	25	6	0	0	RDT
Asia	Haque	2007	Journal	Bangladesh	46	70	59	587	01	2	70	23.0592	91.8275	GPS	9	2007	10	2007	25	10	0	0	RDT
Asia	Haque	2007	Journal	Bangladesh	46	70	59	587	11	2	110	23.0594	91.8461	GPS	9	2007	10	2007	25	0	0	0	RDT
Asia	Haque	2007	Journal	Bangladesh	46	70	83	965	10	3	58	23.3089	91.8072	GPS	9	2007	10	2007	25	6	0	0	RDT
Asia	Haque	2007	Journal	Bangladesh	46	77	19	382	16	2	70	23.3346	91.9088	GPS	9	2007	10	2007	25	1	0	0	RDT
Asia	Haque	2007	Journal	Bangladesh	46	77	38	459	09	4	55	23.2831	91.9044	GPS	9	2007	10	2007	25	4	0	0	RDT
Asia	Haque	2007	Journal	Bangladesh	46	77	38	870	13	6	72	23.2762	91.9182	GPS	9	2007	10	2007	25	2	0	0	RDT
Asia	Haque	2007	Journal	Bangladesh	46	77	57	153	21	6	60	23.3335	91.8933	GPS	9	2007	10	2007	25	2	0	0	RDT
Asia	Haque	2007	Journal	Bangladesh	46	77	76	765	20	3	60	23.3285	91.9015	GPS	9	2007	10	2007	25	0	0	0	RDT
Asia	Haque	2007	Journal	Bangladesh	46	77	76	765	31	5	47	23.3184	91.8989	GPS	9	2007	10	2007	25	1	0	0	RDT
Asia	Haque	2007	Journal	Bangladesh	46	77	76	765	54	2	65	23.3399	91.8981	GPS	9	2007	10	2007	25	0	0	0	RDT
Asia	Haque	2007	Journal	Bangladesh	46	80	76	884	06	1	75	22.9736	91.7228	GPS	9	2007	10	2007	25	4	0	0	RDT
Asia	Haque	2008	Journal	Bangladesh	46	80	76	884	19	1	70	23.04	91.7703	GPS	9	2007	10	2007	25	7	0	0	RDT
Asia	Haque	2009	Journal	Bangladesh	46	80	76	884	23	1	68	22.9658	91.7431	GPS	9	2007	10	2007	25	5	0	0	RDT
